# Supplementary material
Source: PubMed Central journal article supplement (PMC7577517)
Supplement: NIHMS1604869-supplement-AHA_COVID_Registry_-_Supplemental_Material.pdf [file NIHMS1604869-supplement-AHA_COVID_Registry_-_Supplemental_Material.pdf]

|                                                                              |                                                                                                                                                                                                                                                                                                                                                                                                                                                                                                                                                                                                                                                                                                                                                                                                                           |                                                                        |                          |                                 |
|------------------------------------------------------------------------------|---------------------------------------------------------------------------------------------------------------------------------------------------------------------------------------------------------------------------------------------------------------------------------------------------------------------------------------------------------------------------------------------------------------------------------------------------------------------------------------------------------------------------------------------------------------------------------------------------------------------------------------------------------------------------------------------------------------------------------------------------------------------------------------------------------------------------|------------------------------------------------------------------------|--------------------------|---------------------------------|
| <b>Patient ID:</b>                                                           |                                                                                                                                                                                                                                                                                                                                                                                                                                                                                                                                                                                                                                                                                                                                                                                                                           |                                                                        |                          | <b>Bold Question = Required</b> |
| <b>DEMOGRAPHICS</b>                                                          |                                                                                                                                                                                                                                                                                                                                                                                                                                                                                                                                                                                                                                                                                                                                                                                                                           |                                                                        |                          | <i>Demographics Tab</i>         |
| <b>Sex</b>                                                                   | <input type="radio"/> Male <input type="radio"/> Female <input type="radio"/> Unknown                                                                                                                                                                                                                                                                                                                                                                                                                                                                                                                                                                                                                                                                                                                                     |                                                                        |                          |                                 |
| <b>Date of Birth:</b>                                                        | ____/____/____                                                                                                                                                                                                                                                                                                                                                                                                                                                                                                                                                                                                                                                                                                                                                                                                            | <b>Age:</b>                                                            | _____                    |                                 |
| <b>Zip Code:</b>                                                             | _____ - _____                                                                                                                                                                                                                                                                                                                                                                                                                                                                                                                                                                                                                                                                                                                                                                                                             | <b>Homeless:</b>                                                       | <input type="checkbox"/> |                                 |
| <b>Payment Source</b>                                                        | <input type="checkbox"/> Medicare Title 18 <input type="checkbox"/> Medicaid Title 19 <input type="checkbox"/> Medicare – Private/ HMO/ PPO/ Other<br><input type="checkbox"/> Medicaid – Private/ HMO/ PPO/ Other <input type="checkbox"/> Private/ HMO/ PPO/ Other <input type="checkbox"/> Other<br><input type="checkbox"/> Self Pay/ No Insurance <input type="checkbox"/> Other/ Not Documented/ UTD <input type="checkbox"/> VA/ CHAMPVA/ Tricare                                                                                                                                                                                                                                                                                                                                                                  |                                                                        |                          |                                 |
| <b>RACE AND ETHNICITY</b>                                                    |                                                                                                                                                                                                                                                                                                                                                                                                                                                                                                                                                                                                                                                                                                                                                                                                                           |                                                                        |                          |                                 |
| <b>Race (Select all that apply):</b>                                         | <input type="checkbox"/> American Indian/Alaska Native<br><input type="checkbox"/> Black or African American<br><input type="checkbox"/> White<br><input type="checkbox"/> Asian<br>[if Asian selected]<br><input type="checkbox"/> Asian Indian<br><input type="checkbox"/> Chinese<br><input type="checkbox"/> Filipino<br><input type="checkbox"/> Japanese<br><input type="checkbox"/> Korean<br><input type="checkbox"/> Vietnamese<br><input type="checkbox"/> Other Asian<br><input type="checkbox"/> Native Hawaiian or Pacific Islander<br>[if native Hawaiian or pacific islander selected]<br><input type="checkbox"/> Native Hawaiian<br><input type="checkbox"/> Guamanian or Chamorro<br><input type="checkbox"/> Samoan<br><input type="checkbox"/> Other Pacific Islander<br><input type="checkbox"/> UTD |                                                                        |                          |                                 |
| <b>Hispanic Ethnicity:</b>                                                   | <input type="radio"/> Yes <input type="radio"/> No/UTD                                                                                                                                                                                                                                                                                                                                                                                                                                                                                                                                                                                                                                                                                                                                                                    |                                                                        |                          |                                 |
| <b>If Yes,</b>                                                               | <input type="radio"/> Another Hispanic, Latino or Spanish Origin <input type="radio"/> Mexican, Mexican American, Chicano/a<br><input type="radio"/> Cuban <input type="radio"/> Puerto Rican                                                                                                                                                                                                                                                                                                                                                                                                                                                                                                                                                                                                                             |                                                                        |                          |                                 |
| <b>ADMIN</b>                                                                 |                                                                                                                                                                                                                                                                                                                                                                                                                                                                                                                                                                                                                                                                                                                                                                                                                           |                                                                        |                          | <i>Admin Tab</i>                |
| <b>Arrival Date/Time:</b>                                                    | ____/____/____:____                                                                                                                                                                                                                                                                                                                                                                                                                                                                                                                                                                                                                                                                                                                                                                                                       | <input type="radio"/> MM/DD/YYYY only<br><input type="radio"/> Unknown | <b>Admission Date:</b>   | ____/____/____                  |
| <b>Discharge Date/Time:</b>                                                  | ____/____/____:____                                                                                                                                                                                                                                                                                                                                                                                                                                                                                                                                                                                                                                                                                                                                                                                                       | <input type="checkbox"/> MM/DD/YYYY only                               |                          |                                 |
| <b>What was the patient's discharge disposition on the day of discharge?</b> | <input type="checkbox"/> 1 – Home<br><input type="checkbox"/> 2 – Hospice – Home<br><input type="checkbox"/> 3 – Hospice – Health Care Facility<br><input type="checkbox"/> 4 – Acute Care Facility<br><input type="checkbox"/> 5 – Other Health Care Facility<br><input type="checkbox"/> 6 – Expired<br><input type="checkbox"/> 7 – Left Against medical Advice / AMA<br><input type="checkbox"/> 8 – Not Documented or Unable to Determine (UTD)                                                                                                                                                                                                                                                                                                                                                                      |                                                                        |                          |                                 |
| <b>If Other Health Care Facility</b>                                         | <input type="radio"/> Inpatient Rehabilitation Facility (IRF) <input type="radio"/> Skilled Nursing Facility (SNF)<br><input type="radio"/> Intermediate Care facility (ICF) <input type="radio"/> Other<br><input type="radio"/> Long Term Care Hospital (LTCH)                                                                                                                                                                                                                                                                                                                                                                                                                                                                                                                                                          |                                                                        |                          |                                 |
| <b>ARRIVAL AND ADMISSION INFORMATION</b>                                     |                                                                                                                                                                                                                                                                                                                                                                                                                                                                                                                                                                                                                                                                                                                                                                                                                           |                                                                        |                          | <i>Admission Tab</i>            |
| <b>Means of Transport to your Facility:</b>                                  | <input type="radio"/> Air <input type="radio"/> Ambulance <input type="radio"/> Transfer from another hospital <input type="radio"/> Walk-In <input type="radio"/> ND or Unknown                                                                                                                                                                                                                                                                                                                                                                                                                                                                                                                                                                                                                                          |                                                                        |                          |                                 |
| <b>MEDICAL HISTORY</b>                                                       |                                                                                                                                                                                                                                                                                                                                                                                                                                                                                                                                                                                                                                                                                                                                                                                                                           |                                                                        |                          |                                 |

|                                                                                             |                                                                                                                                                                                                                                                                                                                                                                                                                                                                                                                                                                                                                   |                                                                                                                                                                                                                                                                                                                                                                                                                                      |                                                                                                                                                                                                                                                                                                                                                                                                                   |
|---------------------------------------------------------------------------------------------|-------------------------------------------------------------------------------------------------------------------------------------------------------------------------------------------------------------------------------------------------------------------------------------------------------------------------------------------------------------------------------------------------------------------------------------------------------------------------------------------------------------------------------------------------------------------------------------------------------------------|--------------------------------------------------------------------------------------------------------------------------------------------------------------------------------------------------------------------------------------------------------------------------------------------------------------------------------------------------------------------------------------------------------------------------------------|-------------------------------------------------------------------------------------------------------------------------------------------------------------------------------------------------------------------------------------------------------------------------------------------------------------------------------------------------------------------------------------------------------------------|
| <b>Past Medical History:</b>                                                                | <input type="checkbox"/> No Medical History<br><input type="checkbox"/> Atrial Fibrillation<br><input type="checkbox"/> Atrial Flutter<br><input type="checkbox"/> Cancer<br><input type="checkbox"/> Cerebrovascular Disease<br><input type="checkbox"/> Stroke<br><input type="checkbox"/> TIA<br><input type="checkbox"/> Chronic kidney disease<br><input type="checkbox"/> Currently on Dialysis<br><input type="checkbox"/> DVT<br><input type="checkbox"/> Diabetes Mellitus<br><input type="checkbox"/> Dyslipidemia                                                                                      | <input type="checkbox"/> eCigarette (vaping)<br><input type="checkbox"/> Heart Failure<br><input type="checkbox"/> Hypertension<br><input type="checkbox"/> Immune disorders<br><input type="checkbox"/> HIV<br><input type="checkbox"/> Lupus<br><input type="checkbox"/> Rheumatoid Arthritis<br><input type="checkbox"/> Other<br><input type="checkbox"/> Organ Transplant<br><input type="checkbox"/> Peripheral Artery Disease | <input type="checkbox"/> Prior CABG<br><input type="checkbox"/> Prior MI<br><input type="checkbox"/> Prior PCI<br><input type="checkbox"/> Pulmonary embolism<br><input type="checkbox"/> Pulmonary disease<br><input type="checkbox"/> COPD<br><input type="checkbox"/> Interstitial lung Disease (ILD)<br><input type="checkbox"/> Asthma<br><input type="checkbox"/> Other<br><input type="checkbox"/> Smoking |
| <b>DIAGNOSIS &amp; EVALUATION</b>                                                           |                                                                                                                                                                                                                                                                                                                                                                                                                                                                                                                                                                                                                   |                                                                                                                                                                                                                                                                                                                                                                                                                                      |                                                                                                                                                                                                                                                                                                                                                                                                                   |
| <b>COVID-19 Diagnosis</b>                                                                   | <input type="radio"/> Yes, prior to admission <input type="radio"/> Yes, after discharge<br><input type="radio"/> Yes, during hospitalization <input type="radio"/> Unknown/ND                                                                                                                                                                                                                                                                                                                                                                                                                                    |                                                                                                                                                                                                                                                                                                                                                                                                                                      |                                                                                                                                                                                                                                                                                                                                                                                                                   |
| Method of diagnosis:                                                                        | <input type="radio"/> Clinical diagnosis using hospital specific criteria <input type="radio"/> RT-PCR Test                                                                                                                                                                                                                                                                                                                                                                                                                                                                                                       |                                                                                                                                                                                                                                                                                                                                                                                                                                      |                                                                                                                                                                                                                                                                                                                                                                                                                   |
| Date of dx                                                                                  | _____ / _____ / _____ <input type="checkbox"/> Unknown                                                                                                                                                                                                                                                                                                                                                                                                                                                                                                                                                            |                                                                                                                                                                                                                                                                                                                                                                                                                                      |                                                                                                                                                                                                                                                                                                                                                                                                                   |
| <b>Date of COVID-19 symptom onset?</b>                                                      | _____ / _____ / _____ <input type="checkbox"/> Unknown                                                                                                                                                                                                                                                                                                                                                                                                                                                                                                                                                            |                                                                                                                                                                                                                                                                                                                                                                                                                                      |                                                                                                                                                                                                                                                                                                                                                                                                                   |
| Documented Symptoms                                                                         | <input type="checkbox"/> Confusion or Altered Mental Status <input type="checkbox"/> Myalgia<br><input type="checkbox"/> Cough <input type="checkbox"/> Nasal Congestion<br><input type="checkbox"/> Fatigue <input type="checkbox"/> Nausea, Vomiting, or Diarrhea<br><input type="checkbox"/> Fever/ Chills <input type="checkbox"/> Shortness of Breath<br><input type="checkbox"/> Headache <input type="checkbox"/> Sore Throat<br><input type="checkbox"/> Loss of Sense of Smell/ Taste <input type="checkbox"/> Other: _____<br><input type="checkbox"/> Headache <input type="checkbox"/> Not Documented |                                                                                                                                                                                                                                                                                                                                                                                                                                      |                                                                                                                                                                                                                                                                                                                                                                                                                   |
| <b>Presence of interstitial infiltrates on initial Chest X-ray or CT</b>                    | <input type="radio"/> Yes <input type="radio"/> No <input type="radio"/> ND                                                                                                                                                                                                                                                                                                                                                                                                                                                                                                                                       |                                                                                                                                                                                                                                                                                                                                                                                                                                      |                                                                                                                                                                                                                                                                                                                                                                                                                   |
| <b>During admission, was this patient enrolled in a clinical trial related to COVID-19?</b> | <input type="radio"/> Yes <input type="radio"/> No/ND                                                                                                                                                                                                                                                                                                                                                                                                                                                                                                                                                             |                                                                                                                                                                                                                                                                                                                                                                                                                                      |                                                                                                                                                                                                                                                                                                                                                                                                                   |
| <b>MEDICATION PRIOR TO ADMISSION</b>                                                        |                                                                                                                                                                                                                                                                                                                                                                                                                                                                                                                                                                                                                   |                                                                                                                                                                                                                                                                                                                                                                                                                                      |                                                                                                                                                                                                                                                                                                                                                                                                                   |
| <b>Medications prescribed or taking at time of admission:</b>                               |                                                                                                                                                                                                                                                                                                                                                                                                                                                                                                                                                                                                                   |                                                                                                                                                                                                                                                                                                                                                                                                                                      |                                                                                                                                                                                                                                                                                                                                                                                                                   |
| <b>Anti-hypertensive</b>                                                                    | <input type="radio"/> Yes <input type="radio"/> No/ND                                                                                                                                                                                                                                                                                                                                                                                                                                                                                                                                                             |                                                                                                                                                                                                                                                                                                                                                                                                                                      |                                                                                                                                                                                                                                                                                                                                                                                                                   |
| Anti-hypertensive Tx (Select all that apply)                                                | <input type="checkbox"/> Ace Inhibitors <input type="checkbox"/> CA++ Channel Blockers<br><input type="checkbox"/> ARB <input type="checkbox"/> Diuretics<br><input type="checkbox"/> ARNI <input type="checkbox"/> MRA<br><input type="checkbox"/> Beta Blockers <input type="checkbox"/> Other anti-hypertensive med                                                                                                                                                                                                                                                                                            |                                                                                                                                                                                                                                                                                                                                                                                                                                      |                                                                                                                                                                                                                                                                                                                                                                                                                   |
| ACEI administered during hospitalization                                                    | <input type="radio"/> Yes <input type="radio"/> No <input type="radio"/> ND                                                                                                                                                                                                                                                                                                                                                                                                                                                                                                                                       |                                                                                                                                                                                                                                                                                                                                                                                                                                      |                                                                                                                                                                                                                                                                                                                                                                                                                   |
| ARB administered during hospitalization                                                     | <input type="radio"/> Yes <input type="radio"/> No <input type="radio"/> ND                                                                                                                                                                                                                                                                                                                                                                                                                                                                                                                                       |                                                                                                                                                                                                                                                                                                                                                                                                                                      |                                                                                                                                                                                                                                                                                                                                                                                                                   |
| <b>Lipid Lowering Therapy</b>                                                               | <input type="radio"/> Yes <input type="radio"/> No/ND                                                                                                                                                                                                                                                                                                                                                                                                                                                                                                                                                             |                                                                                                                                                                                                                                                                                                                                                                                                                                      |                                                                                                                                                                                                                                                                                                                                                                                                                   |
| Lipid lowering therapy (Select all that apply)                                              | <input type="checkbox"/> Ezetimibe <input type="checkbox"/> Statin<br><input type="checkbox"/> PCSK 9 Inhibitor <input type="checkbox"/> Other lipid lowering med                                                                                                                                                                                                                                                                                                                                                                                                                                                 |                                                                                                                                                                                                                                                                                                                                                                                                                                      |                                                                                                                                                                                                                                                                                                                                                                                                                   |
| <b>Antiplatelet</b>                                                                         | <input type="radio"/> Yes <input type="radio"/> No/ND                                                                                                                                                                                                                                                                                                                                                                                                                                                                                                                                                             |                                                                                                                                                                                                                                                                                                                                                                                                                                      |                                                                                                                                                                                                                                                                                                                                                                                                                   |
| Antiplatelet Tx (Select all that apply)                                                     | <input type="checkbox"/> Aspirin <input type="checkbox"/> Other Antiplatelet<br><input type="checkbox"/> P2Y12 Inhibitors                                                                                                                                                                                                                                                                                                                                                                                                                                                                                         |                                                                                                                                                                                                                                                                                                                                                                                                                                      |                                                                                                                                                                                                                                                                                                                                                                                                                   |
| <b>Anticoagulant</b>                                                                        | <input type="radio"/> Yes <input type="radio"/> No/ND                                                                                                                                                                                                                                                                                                                                                                                                                                                                                                                                                             |                                                                                                                                                                                                                                                                                                                                                                                                                                      |                                                                                                                                                                                                                                                                                                                                                                                                                   |

|                                                     |                                                                                                                                                                                                                                                                                                                                                                                                                                                                                |
|-----------------------------------------------------|--------------------------------------------------------------------------------------------------------------------------------------------------------------------------------------------------------------------------------------------------------------------------------------------------------------------------------------------------------------------------------------------------------------------------------------------------------------------------------|
| Anticoagulant Tx (Select all that apply)            | <input type="checkbox"/> Direct Thrombin Inhibitor<br><input type="checkbox"/> Factor Xa Inhibitor <input type="checkbox"/> Warfarin<br><input type="checkbox"/> Other Anticoagulant                                                                                                                                                                                                                                                                                           |
| Anti-hyperglycemic                                  | <input type="radio"/> Yes <input type="radio"/> No/ND<br><input type="checkbox"/> DPP-4 Inhibitors<br><input type="checkbox"/> GLP-1 Receptor Agonist<br><input type="checkbox"/> Insulin<br><input type="checkbox"/> Metformin<br><input type="checkbox"/> SGLT2 Inhibitor <input type="checkbox"/> Sulfonylurea<br><input type="checkbox"/> Thiazolidinedione<br><input type="checkbox"/> Other Injectable/ Subcutaneous Agent<br><input type="checkbox"/> Other Oral Agents |
| Corticosteroid                                      | <input type="radio"/> Inhaled <input type="radio"/> Oral <input type="radio"/> None/ND                                                                                                                                                                                                                                                                                                                                                                                         |
| Immunosuppressive medications (other than steroids) | <input type="radio"/> Yes <input type="radio"/> No/ND                                                                                                                                                                                                                                                                                                                                                                                                                          |
| Chemo or biological treatment for cancer            | <input type="radio"/> Yes <input type="radio"/> No/ND                                                                                                                                                                                                                                                                                                                                                                                                                          |
| Hydroxychloroquine                                  | <input type="radio"/> Yes <input type="radio"/> No/ND                                                                                                                                                                                                                                                                                                                                                                                                                          |

**HOSPITALIZATION** *Hospitalization Tab*

During this admission: If multiple events, record Date/Time of first episode.

|                                                                                                   |                                                                                                                                                                                                                                                                                                                                                                                                                                                                                                                       |
|---------------------------------------------------------------------------------------------------|-----------------------------------------------------------------------------------------------------------------------------------------------------------------------------------------------------------------------------------------------------------------------------------------------------------------------------------------------------------------------------------------------------------------------------------------------------------------------------------------------------------------------|
| <b>Documentation of Presenting EKG</b><br>Rhythm<br>QTC Value _____ ms<br>EKG abnormalities       | <input type="radio"/> Yes <input type="radio"/> No/ND<br><input type="radio"/> Atrial Fibrillation <input type="radio"/> Atrial Flutter <input type="radio"/> Sinus <input type="radio"/> Other<br><input type="radio"/> Not Documented<br><input type="checkbox"/> None <input type="checkbox"/> Right Bundle Branch Block <input type="checkbox"/> ST-Segment Elevation<br><input type="checkbox"/> Left Bundle Branch Block <input type="checkbox"/> ST-Segment Depression <input type="checkbox"/> Not Documented |
| <b>Sustained ventricular arrhythmias</b><br>Date/Time of sustained ventricular arrhythmia         | <input type="radio"/> Yes <input type="radio"/> No/ND<br>____/____/____ : ____ <input type="radio"/> MM/DD/YYYY only <input type="radio"/> Unknown                                                                                                                                                                                                                                                                                                                                                                    |
| <b>Atrial Fibrillation</b><br>Date/Time of A-Fib                                                  | <input type="radio"/> Yes <input type="radio"/> No/ND<br>____/____/____ : ____ <input type="radio"/> MM/DD/YYYY only <input type="radio"/> Unknown                                                                                                                                                                                                                                                                                                                                                                    |
| <b>Heart block requiring a temporary or permanent pacemaker</b><br>Date/Time of HB intervention   | <input type="radio"/> Yes <input type="radio"/> No/ND<br>____/____/____ : ____ <input type="radio"/> MM/DD/YYYY only <input type="radio"/> Unknown                                                                                                                                                                                                                                                                                                                                                                    |
| <b>Acute Myocardial Infarction (AMI):</b><br>STEMI reperfusion<br>NSTEMI type<br>Date/time of AMI | <input type="radio"/> STEMI <input type="radio"/> NSTEMI <input type="radio"/> No/ND<br><input type="radio"/> Fibrinolytic Therapy <input type="radio"/> Primary PCI <input type="radio"/> No reperfusion therapy<br><input type="radio"/> Type 1 MI <input type="radio"/> Type 2 (demand-related) MI <input type="radio"/> ND<br>____/____/____ : ____ <input type="radio"/> MM/DD/YYYY only <input type="radio"/> Unknown                                                                                           |
| <b>Percutaneous Coronary Intervention (PCI)</b><br>Date/Time of PCI                               | <input type="radio"/> Yes <input type="radio"/> No/ND<br>____/____/____ : ____ <input type="radio"/> MM/DD/YYYY only <input type="radio"/> Unknown                                                                                                                                                                                                                                                                                                                                                                    |
| <b>LVEF assessment:</b><br>Date of LVEF assessment<br>EF – Quantitative (%)                       | <input type="radio"/> Yes <input type="radio"/> No/ND<br>____/____/____ <input type="radio"/> Unknown<br>_____% <input type="radio"/> Not Documented                                                                                                                                                                                                                                                                                                                                                                  |
| <b>Is there documentation of</b>                                                                  | <input type="radio"/> Yes <input type="radio"/> No/ND                                                                                                                                                                                                                                                                                                                                                                                                                                                                 |

|                                                                                                                                                                                                                                                                                                                                                                                                                                                                                                                                                                                                                                                       |
|-------------------------------------------------------------------------------------------------------------------------------------------------------------------------------------------------------------------------------------------------------------------------------------------------------------------------------------------------------------------------------------------------------------------------------------------------------------------------------------------------------------------------------------------------------------------------------------------------------------------------------------------------------|
| <b>an LVEF assessment within the last year?</b><br>Last Known EF _____ % <input type="radio"/> Not Documented                                                                                                                                                                                                                                                                                                                                                                                                                                                                                                                                         |
| <b>Coronary Angiogram</b><br>Angiogram type <input type="radio"/> Yes <input type="radio"/> No/ND<br><input type="radio"/> CTA <input type="radio"/> Invasive (cath) <input type="radio"/> ND<br>Number of vessels with ≥ 50% stenosis <input type="radio"/> 0 <input type="radio"/> 2 <input type="radio"/> Left main CAD<br><input type="radio"/> 1 <input type="radio"/> ≥3 <input type="radio"/> Not Documented<br>Date/Time of cardiac angiogram _____/_____/_____:____ <input type="radio"/> MM/DD/YYYY only <input type="radio"/> Unknown                                                                                                      |
| <b>In-hospital Shock</b><br>Shock type <input type="radio"/> Yes <input type="radio"/> No/ND<br><input type="radio"/> Cardiogenic <input type="radio"/> Mixed<br><input type="radio"/> Distributive (e.g. Sepsis) <input type="radio"/> Other/Unknown<br>Shock Management (select all that apply)<br><input type="checkbox"/> IABP <input type="checkbox"/> V-A ECMO<br><input type="checkbox"/> Impella or other PVAD <input type="checkbox"/> V-V ECMO<br><input type="checkbox"/> Inotropes/Vasopressors<br>Date/Time of mechanical circulatory support _____/_____/_____:____ <input type="radio"/> MM/DD/YYYY only <input type="radio"/> Unknown |
| <b>New-onset heart failure</b><br>Specify HF: <input type="radio"/> Yes <input type="radio"/> No/ND<br><input type="radio"/> Systolic (HFrEF) <input type="radio"/> Diastolic (HFpEF)<br>Date of HF _____/_____/_____ <input type="radio"/> Unknown                                                                                                                                                                                                                                                                                                                                                                                                   |
| <b>Myocarditis</b><br>Diagnostic test <input type="radio"/> Yes <input type="radio"/> No/ND<br><input type="checkbox"/> Cardiac biopsy <input type="checkbox"/> CT<br><input type="checkbox"/> MRI <input type="checkbox"/> Clinical diagnosis<br>Date of Myocarditis _____/_____/_____ <input type="radio"/> Unknown                                                                                                                                                                                                                                                                                                                                 |
| <b>Deep Vein Thrombosis (DVT)</b><br>Date of DVT diagnosis _____/_____/_____ <input type="radio"/> Yes <input type="radio"/> No/ND <input type="radio"/> Unknown                                                                                                                                                                                                                                                                                                                                                                                                                                                                                      |
| <b>Pulmonary Embolus (PE)</b><br>Date of PE diagnosis _____/_____/_____ <input type="radio"/> Yes <input type="radio"/> No/ND <input type="radio"/> Unknown                                                                                                                                                                                                                                                                                                                                                                                                                                                                                           |
| <b>Intracardiac Thrombus</b><br>Date of Intracardiac thrombus diagnosis _____/_____/_____ <input type="radio"/> Yes <input type="radio"/> No/ND <input type="radio"/> Unknown                                                                                                                                                                                                                                                                                                                                                                                                                                                                         |
| <b>Clinical bleeding requiring transfusion</b><br>Date of transfusion _____/_____/_____ <input type="radio"/> Yes <input type="radio"/> No/ND <input type="radio"/> Unknown                                                                                                                                                                                                                                                                                                                                                                                                                                                                           |
| <b>New Hemodialysis or CRRT</b><br>Date of New hemodialysis _____/_____/_____ <input type="radio"/> Yes <input type="radio"/> No/ND <input type="radio"/> Unknown                                                                                                                                                                                                                                                                                                                                                                                                                                                                                     |
| <b>Ischemic stroke / intracranial hemorrhage</b><br>Initial NIH Stroke Scale _____ <input type="radio"/> Yes <input type="radio"/> No/ND <input type="radio"/> Not Documented<br>Imaging <input type="radio"/> CT <input type="radio"/> MRI <input type="radio"/> Not Documented<br>Imaging shows acute stroke? <input type="radio"/> Yes <input type="radio"/> No/ND<br>Stroke treatment <input type="radio"/> Thrombolysis <input type="radio"/> Thrombectomy <input type="radio"/> None/ND                                                                                                                                                         |

|                                                                                                   |                                                                                                                                                                                                                                                                                                                                                                                                                                |                    |                                                                                               |                           |                                             |                          |                                                                                            |
|---------------------------------------------------------------------------------------------------|--------------------------------------------------------------------------------------------------------------------------------------------------------------------------------------------------------------------------------------------------------------------------------------------------------------------------------------------------------------------------------------------------------------------------------|--------------------|-----------------------------------------------------------------------------------------------|---------------------------|---------------------------------------------|--------------------------|--------------------------------------------------------------------------------------------|
| Stroke or intracranial hemorrhage type:                                                           | <input type="checkbox"/> Cerebral Venous Sinus Thrombosis <input type="checkbox"/> Subarachnoid Hemorrhage<br><input type="checkbox"/> Intracerebral Hemorrhage <input type="checkbox"/> Subdural/ Epidural Hemorrhage<br><input type="checkbox"/> Ischemic Stroke <input type="checkbox"/> Transient Ischemic Attack (TIA)<br><input type="checkbox"/> Stroke Not Otherwise Specified <input type="checkbox"/> Not Documented |                    |                                                                                               |                           |                                             |                          |                                                                                            |
| Date of stroke diagnosis                                                                          | ____/____/____                                                                                                                                                                                                                                                                                                                                                                                                                 |                    | ○ Unknown                                                                                     |                           |                                             |                          |                                                                                            |
| <b>Seizure</b>                                                                                    | ○ Yes                                      ○ No/ND                                                                                                                                                                                                                                                                                                                                                                             |                    |                                                                                               |                           |                                             |                          |                                                                                            |
| Date of seizure                                                                                   | ____/____/____                                                                                                                                                                                                                                                                                                                                                                                                                 |                    | ○ Unknown                                                                                     |                           |                                             |                          |                                                                                            |
| <b>Cardiac Arrest (Code Blue, CPR)</b>                                                            | ○ Yes                                      ○ No/ND                                                                                                                                                                                                                                                                                                                                                                             |                    |                                                                                               |                           |                                             |                          |                                                                                            |
| First documented pulseless rhythm                                                                 | <input type="checkbox"/> Asystole<br><input type="checkbox"/> Pulseless Electrical Activity (PEA)<br><input type="checkbox"/> Pulseless Ventricular Tachycardia (VT)                                                                                                                                                                                                                                                           |                    | <input type="checkbox"/> Ventricular Fibrillation (VF)<br><input type="checkbox"/> Unknown/ND |                           |                                             |                          |                                                                                            |
| Date/Time of cardiac arrest                                                                       | ____/____/____ : ____                                                                                                                                                                                                                                                                                                                                                                                                          |                    | ○ MM/DD/YYYY only                      ○ Unknown                                              |                           |                                             |                          |                                                                                            |
| <b>Cause of death documented</b>                                                                  | ○ Yes                                      ○ No/ND                                                                                                                                                                                                                                                                                                                                                                             |                    |                                                                                               |                           |                                             |                          |                                                                                            |
| Cause of death:                                                                                   | <input type="checkbox"/> AMI <input type="checkbox"/> Respiratory<br><input type="checkbox"/> Arrhythmia <input type="checkbox"/> Stroke<br><input type="checkbox"/> HF <input type="checkbox"/> Other                                                                                                                                                                                                                         |                    |                                                                                               |                           |                                             |                          |                                                                                            |
| Date of death                                                                                     | ____/____/____                                                                                                                                                                                                                                                                                                                                                                                                                 |                    | ○ Unknown                                                                                     |                           |                                             |                          |                                                                                            |
| <b>PULMONARY / CRITICAL CARE</b>                                                                  |                                                                                                                                                                                                                                                                                                                                                                                                                                |                    |                                                                                               |                           |                                             |                          |                                                                                            |
| <b>Was this patient managed in an ICU</b>                                                         | ○ Yes                                      ○ No/ND                                                                                                                                                                                                                                                                                                                                                                             |                    |                                                                                               |                           |                                             |                          |                                                                                            |
| Date Transferred to ICU                                                                           | ____/____/____                                                                                                                                                                                                                                                                                                                                                                                                                 |                    | ○ Unknown                                                                                     |                           |                                             |                          |                                                                                            |
| <b>During this hospitalization was the patient intubated or placed on mechanical ventilation?</b> | ○ Yes                                      ○ No/ND                                                                                                                                                                                                                                                                                                                                                                             |                    |                                                                                               |                           |                                             |                          |                                                                                            |
| Date mechanical ventilation initiated                                                             | ____/____/____                                                                                                                                                                                                                                                                                                                                                                                                                 |                    | ○ Unknown                                                                                     |                           |                                             |                          |                                                                                            |
| Date mechanical ventilation terminated                                                            | ____/____/____                                                                                                                                                                                                                                                                                                                                                                                                                 |                    | ○ Unknown                                                                                     |                           |                                             |                          |                                                                                            |
| <b>Was V-V ECMO performed</b>                                                                     | ○ Yes                                      ○ No/ND                                                                                                                                                                                                                                                                                                                                                                             |                    |                                                                                               |                           |                                             |                          |                                                                                            |
| Date V-V ECMO initiated                                                                           | ____/____/____                                                                                                                                                                                                                                                                                                                                                                                                                 |                    | ○ Unknown                                                                                     |                           |                                             |                          |                                                                                            |
| Date V-V ECMO terminated                                                                          | ____/____/____                                                                                                                                                                                                                                                                                                                                                                                                                 |                    | ○ Unknown                                                                                     |                           |                                             |                          |                                                                                            |
| <b>VITALS (Admission)</b>                                                                         |                                                                                                                                                                                                                                                                                                                                                                                                                                |                    |                                                                                               |                           |                                             |                          |                                                                                            |
| <b>Height</b>                                                                                     | ____                                                                                                                                                                                                                                                                                                                                                                                                                           | ○ In<br>○ cm       | <input type="checkbox"/> ND                                                                   | <b>Weight (Admission)</b> | ____                                        | ○ lbs<br>○ kgs           | <input type="checkbox"/> ND                                                                |
| <b>Temperature:</b>                                                                               | <input type="checkbox"/> C<br><input type="checkbox"/> F                                                                                                                                                                                                                                                                                                                                                                       | <b>Heart Rate:</b> | ____ bpm<br><input type="checkbox"/> HR ND                                                    | <b>Blood Pressure:</b>    | ____/____<br><input type="checkbox"/> BP ND | <b>Respiratory Rate:</b> | ____ bpm<br><input type="checkbox"/> RR ND                                                 |
| <input type="checkbox"/> Temp ND                                                                  |                                                                                                                                                                                                                                                                                                                                                                                                                                |                    |                                                                                               |                           |                                             | <b>SAO2:</b>             | ____ %<br><input type="checkbox"/> SAO2 ND<br>○ Room air<br>○ Supplemental O2<br>○ Unknown |
| <b>ADMISSION LABS</b>                                                                             |                                                                                                                                                                                                                                                                                                                                                                                                                                |                    |                                                                                               |                           | <b>Admission Labs Tab</b>                   |                          |                                                                                            |
| <b>Labs (Closest to Admission):</b>                                                               | <b>Hemoglobin:</b>                                                                                                                                                                                                                                                                                                                                                                                                             | ____               | ○ g/dL      ○ g/L                                                                             | ○ Unavailable             |                                             |                          |                                                                                            |
|                                                                                                   | <b>WBC</b>                                                                                                                                                                                                                                                                                                                                                                                                                     | ____               | ○ K/uL      ○ mCL                                                                             | ○ Unavailable             |                                             |                          |                                                                                            |
|                                                                                                   | <b>Platelet:</b>                                                                                                                                                                                                                                                                                                                                                                                                               | ____               | ○ K/uL                                                                                        | ○ Unavailable             |                                             |                          |                                                                                            |
|                                                                                                   | <b>Absolute lymphocyte count:</b>                                                                                                                                                                                                                                                                                                                                                                                              | ____               | ○ X10 <sup>9</sup>                                                                            | ○ Unavailable             |                                             |                          |                                                                                            |
|                                                                                                   | <b>Serum Creatinine (SCR)</b>                                                                                                                                                                                                                                                                                                                                                                                                  | ____               | ○ mg/dL      ○ μmol/L                                                                         | ○ Unavailable             |                                             |                          |                                                                                            |

|                 |       |                                                                                     |                                   |
|-----------------|-------|-------------------------------------------------------------------------------------|-----------------------------------|
| AST             | _____ | <input type="radio"/> u/L                                                           | <input type="radio"/> Unavailable |
| ALT             | _____ | <input type="radio"/> u/L                                                           | <input type="radio"/> Unavailable |
| Total Bilirubin | _____ | <input type="radio"/> mg/dL                                                         | <input type="radio"/> Unavailable |
| Bicarbonate     | _____ | <input type="radio"/> mEq/l <input type="radio"/> mmol/L                            | <input type="radio"/> Unavailable |
| Troponin        | _____ | <input type="radio"/> ng/mL <input type="radio"/> ug/L                              | <input type="radio"/> Unavailable |
| NT-proBNP       | _____ | <input type="radio"/> pg/mL <input type="radio"/> ng/L                              | <input type="radio"/> Unavailable |
| BNP             | _____ | <input type="radio"/> pg/mL <input type="radio"/> pmol/L <input type="radio"/> ng/L | <input type="radio"/> Unavailable |
| Ferritin        | _____ | <input type="radio"/> ng/mL                                                         | <input type="radio"/> Unavailable |
| CRP             | _____ | <input type="radio"/> mg/L <input type="radio"/> ng/L                               | <input type="radio"/> Unavailable |
| IL6             | _____ | <input type="radio"/> pg/mL <input type="radio"/> ng/mL                             | <input type="radio"/> Unavailable |
| D-dimer         | _____ | <input type="radio"/> ng/mL <input type="radio"/> μ/mL                              | <input type="radio"/> Unavailable |
| Procalcitonin   | _____ | <input type="radio"/> μg/L <input type="radio"/> ng/mL                              | <input type="radio"/> Unavailable |
| Hemoglobin A1C  | _____ | <input type="radio"/> %                                                             | <input type="radio"/> Unavailable |

**SERIAL LABS**

*Serial Labs Tab*

Enter the date and the first reported lab value for the corresponding labs in the medical record, if available. Click “Add Instance” to enter lab values for subsequent days of the hospitalization. Serial Labs should be collected for each day of hospitalization.

|                                                           |                                                                                           |
|-----------------------------------------------------------|-------------------------------------------------------------------------------------------|
| Select if serial labs were NOT performed on this patient: | <input type="checkbox"/>                                                                  |
| <b>Date:</b>                                              | ____ / ____ / ____                                                                        |
| <b>Troponin</b>                                           | _____ <input type="radio"/> ng/mL <input type="radio"/> ug/L                              |
| <b>NT-proBNP</b>                                          | _____ <input type="radio"/> pg/mL <input type="radio"/> ng/L                              |
| <b>BNP</b>                                                | _____ <input type="radio"/> pg/mL <input type="radio"/> pmol/L <input type="radio"/> ng/L |
| <b>Ferritin</b>                                           | _____ <input type="radio"/> ng/mL                                                         |
| <b>CRP</b>                                                | _____ <input type="radio"/> mg/L <input type="radio"/> ng/L                               |
| <b>Absolute Lymphocyte count</b>                          | _____ <input type="radio"/> X10 <sup>9</sup>                                              |
| <b>Procalcitonin</b>                                      | _____ <input type="radio"/> μg/L <input type="radio"/> ng/mL                              |
| <b>IL6</b>                                                | _____ <input type="radio"/> pg/mL <input type="radio"/> ng/mL                             |
| <b>Serum Creatinine (SCr)</b>                             | _____ <input type="radio"/> mg/dL <input type="radio"/> μmol/L                            |
| <b>D-dimer</b>                                            | _____ <input type="radio"/> ng/mL <input type="radio"/> μ/mL                              |

**MEDICATIONS**

*Medications Tab*

During this hospitalization, was the patient treated with any of the following medications? (Enter Date of first administration)

|                                                      |                                                                                                                                                                                                                                                                                          |
|------------------------------------------------------|------------------------------------------------------------------------------------------------------------------------------------------------------------------------------------------------------------------------------------------------------------------------------------------|
| <b>Glucocorticoids</b>                               | <input type="radio"/> Yes <input type="radio"/> No <input type="radio"/> NC                                                                                                                                                                                                              |
| Date: Glucocorticoids                                | ____ / ____ / ____ <input type="checkbox"/> Unknown                                                                                                                                                                                                                                      |
| <b>Anticoagulation for DVT prophylaxis/treatment</b> | <input type="radio"/> Yes <input type="radio"/> No <input type="radio"/> NC                                                                                                                                                                                                              |
| Anticoagulant type (DVT)                             | <input type="radio"/> Full Dose DOAC <input type="radio"/> SCD<br><input type="radio"/> Full Dose Enoxaparin <input type="radio"/> Sub-Q Unfractionated Heparin<br><input type="radio"/> Low Dose DOAC <input type="radio"/> Not Documented<br><input type="radio"/> Low Dose Enoxaparin |

|                            |                           |                                                                             |                                  |
|----------------------------|---------------------------|-----------------------------------------------------------------------------|----------------------------------|
|                            | Date: Anticoagulation     | ___/___/___                                                                 | <input type="checkbox"/> Unknown |
| <b>Immunoglobulins</b>     |                           | <input type="radio"/> Yes <input type="radio"/> No <input type="radio"/> NC |                                  |
|                            | Date: Immunoglobulins     | ___/___/___                                                                 | <input type="checkbox"/> Unknown |
| <b>Convalescent serum</b>  |                           | <input type="radio"/> Yes <input type="radio"/> No <input type="radio"/> NC |                                  |
|                            | Date: Convalescent serum  | ___/___/___                                                                 | <input type="checkbox"/> Unknown |
| <b>Ritonavir/lopinavir</b> |                           | <input type="radio"/> Yes <input type="radio"/> No <input type="radio"/> NC |                                  |
|                            | Date: Ritonavir/lopinavir | ___/___/___                                                                 | <input type="checkbox"/> Unknown |
| <b>Hydroxychloroquine</b>  |                           | <input type="radio"/> Yes <input type="radio"/> No <input type="radio"/> NC |                                  |
|                            | Date: Hydroxychloroquine  | ___/___/___                                                                 | <input type="checkbox"/> Unknown |
| <b>Azithromycin</b>        |                           | <input type="radio"/> Yes <input type="radio"/> No <input type="radio"/> NC |                                  |
|                            | Date: Azithromycin        | ___/___/___                                                                 | <input type="checkbox"/> Unknown |
| <b>Remdesivir</b>          |                           | <input type="radio"/> Yes <input type="radio"/> No <input type="radio"/> NC |                                  |
|                            | Date: Remdesivir          | ___/___/___                                                                 | <input type="checkbox"/> Unknown |
| <b>Tocilizumab</b>         |                           | <input type="radio"/> Yes <input type="radio"/> No <input type="radio"/> NC |                                  |
|                            | Date: Tocilizumab         | ___/___/___                                                                 | <input type="checkbox"/> Unknown |
| Other 1 (not listed):      |                           | _____                                                                       |                                  |
|                            | Date: Other 1             | ___/___/___                                                                 | <input type="checkbox"/> Unknown |
| Other 2 (not listed):      |                           | _____                                                                       |                                  |
|                            | Date: Other 2             | ___/___/___                                                                 | <input type="checkbox"/> Unknown |
| Other 3 (not listed):      |                           | _____                                                                       |                                  |
|                            | Date: Other 3             | ___/___/___                                                                 | <input type="checkbox"/> Unknown |
